# Supplementary material for: An advanced method of contributing emissions to short-lived chemical species (OH and HO 2 ): The TAGGING 1.1 submodel based on the Modular Earth Submodel System (MESSy 2.53)
Source: Copernicus journal article supplement (doi:10.5194/gmd-2017-227), 2017-10-25
Supplement: Supplementary file 1 [file gmd-2017-227-supplement.pdf]

*Supplement of*

**An advanced method of contributing emissions to short-lived chemical species (OH and HO<sub>2</sub>): The TAGGING 1.1 submodel based on the Modular Earth Submodel System (MESSy 2.53)**

Vanessa S. Rieger<sup>1,2</sup>, Mariano Mertens<sup>1</sup>, and Volker Grewe<sup>1,2</sup>

<sup>1</sup>Deutsches Zentrum für Luft- und Raumfahrt, Institut für Physik der Atmosphäre, Oberpfaffenhofen, Germany

<sup>2</sup>also at: Delft University of Technology, Aerospace Engineering, Section Aircraft Noise and Climate Effects, Delft, Netherlands

*Correspondence to:* Vanessa S. Rieger (vanessa.rieger@dlr.de)

This document provides additional material to the article: *Rieger et al., An advanced method of contributing emissions to short-lived chemical species (OH and HO<sub>2</sub>): The TAGGING 1.1 submodel based on the Modular Earth Submodel System (MESSy 2.53), 2017*. The following figures compare the contributions of the tagging method V1.0 and the advanced tagging method V1.1 for the ten source categories: emissions from anthropogenic non-traffic (e.g. industry and households), road traffic, ship traffic, air traffic, biogenic sources, biomass burning, lightning, methane and nitrous oxide decomposition and stratospheric ozone production.

# OH

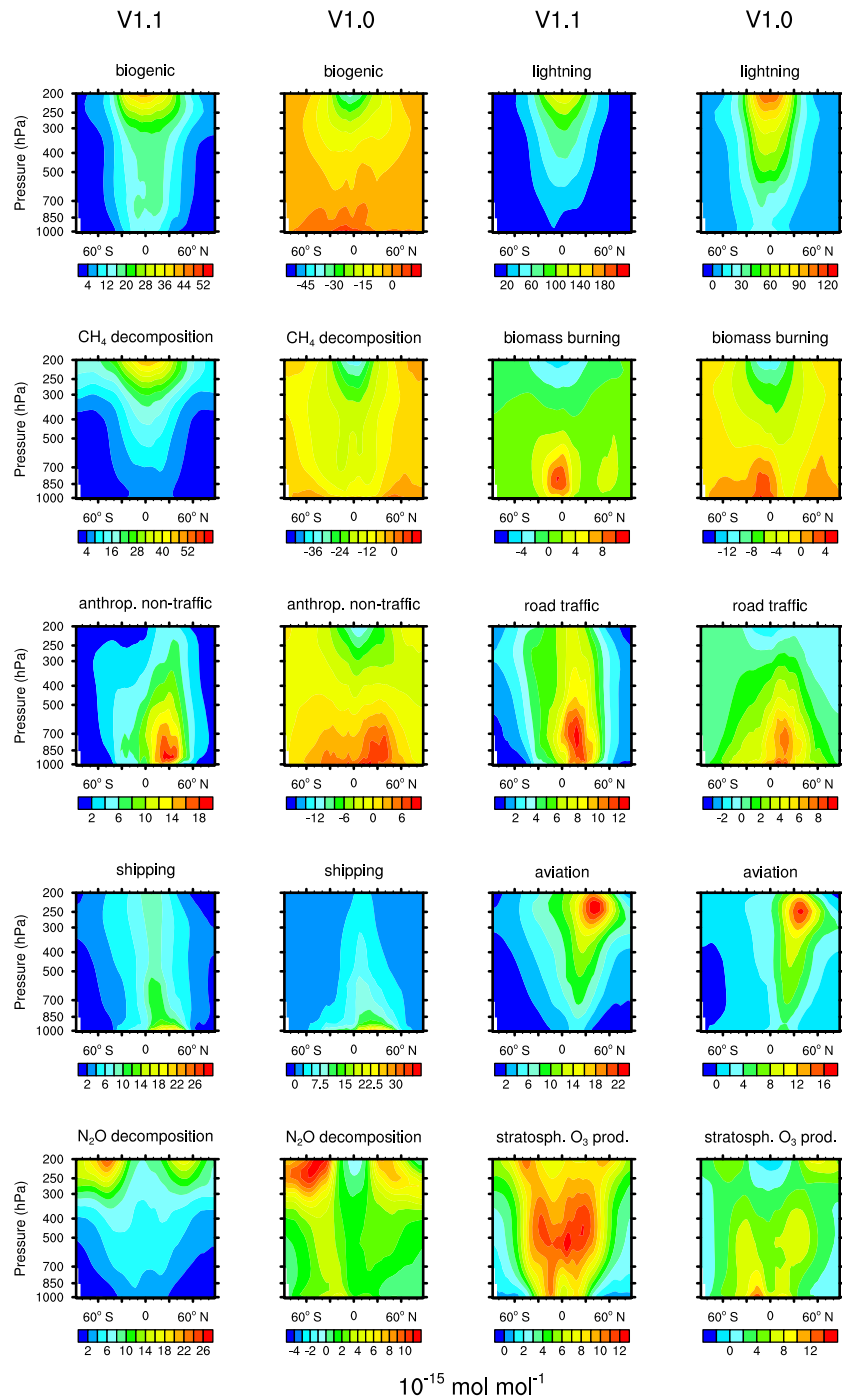

**Figure 1.** Comparison of tagging method V1.1 and V1.0 for OH. First and third columns show the tagging method V1.1. Second and fourth columns show the tagging method V1.0.

# HO<sub>2</sub>

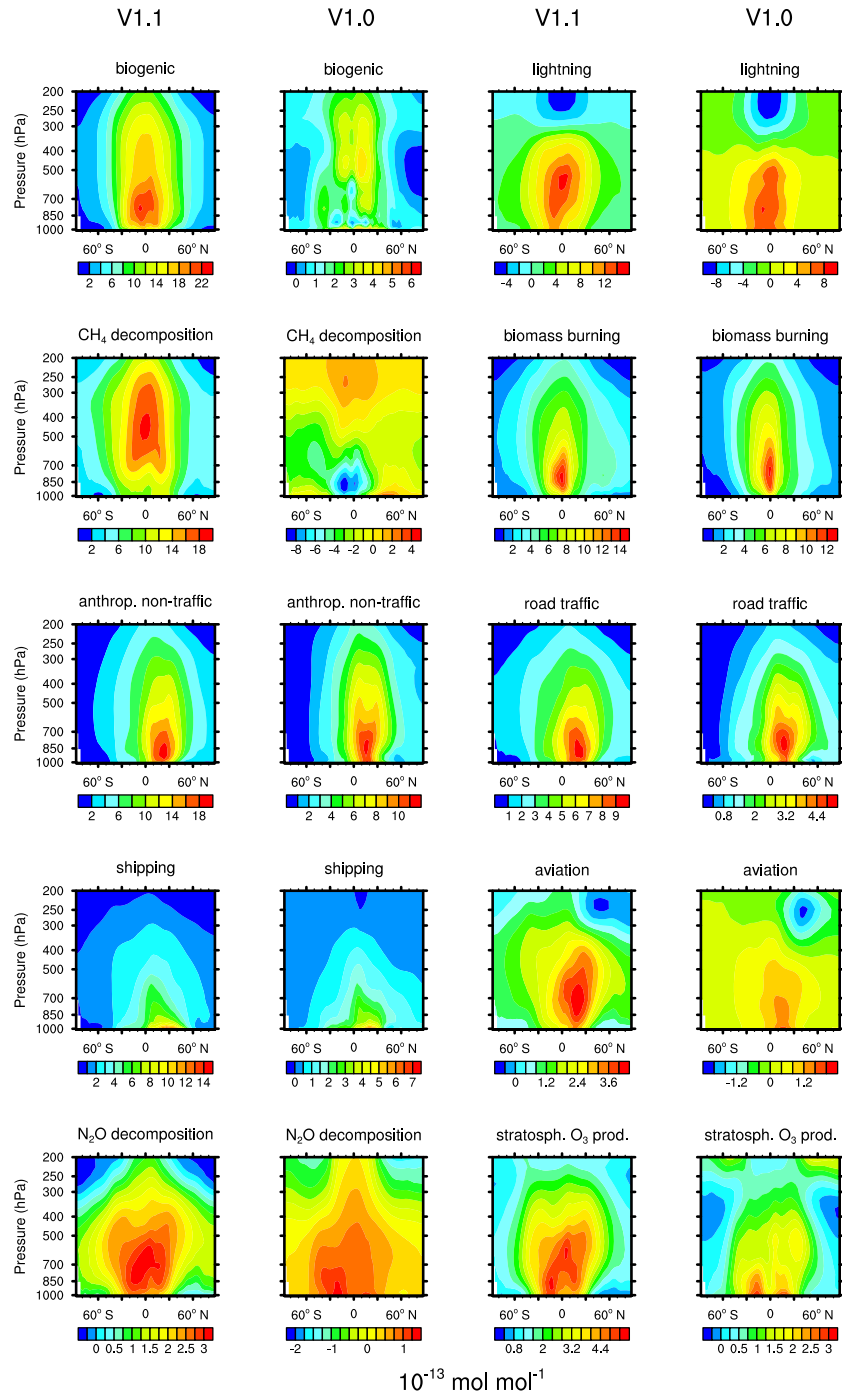

**Figure 2.** Comparison of tagging method V1.1 and V1.0 for HO<sub>2</sub>. First and third columns show the tagging method V1.1. Second and fourth columns show the tagging method V1.0.

# O<sub>3</sub>

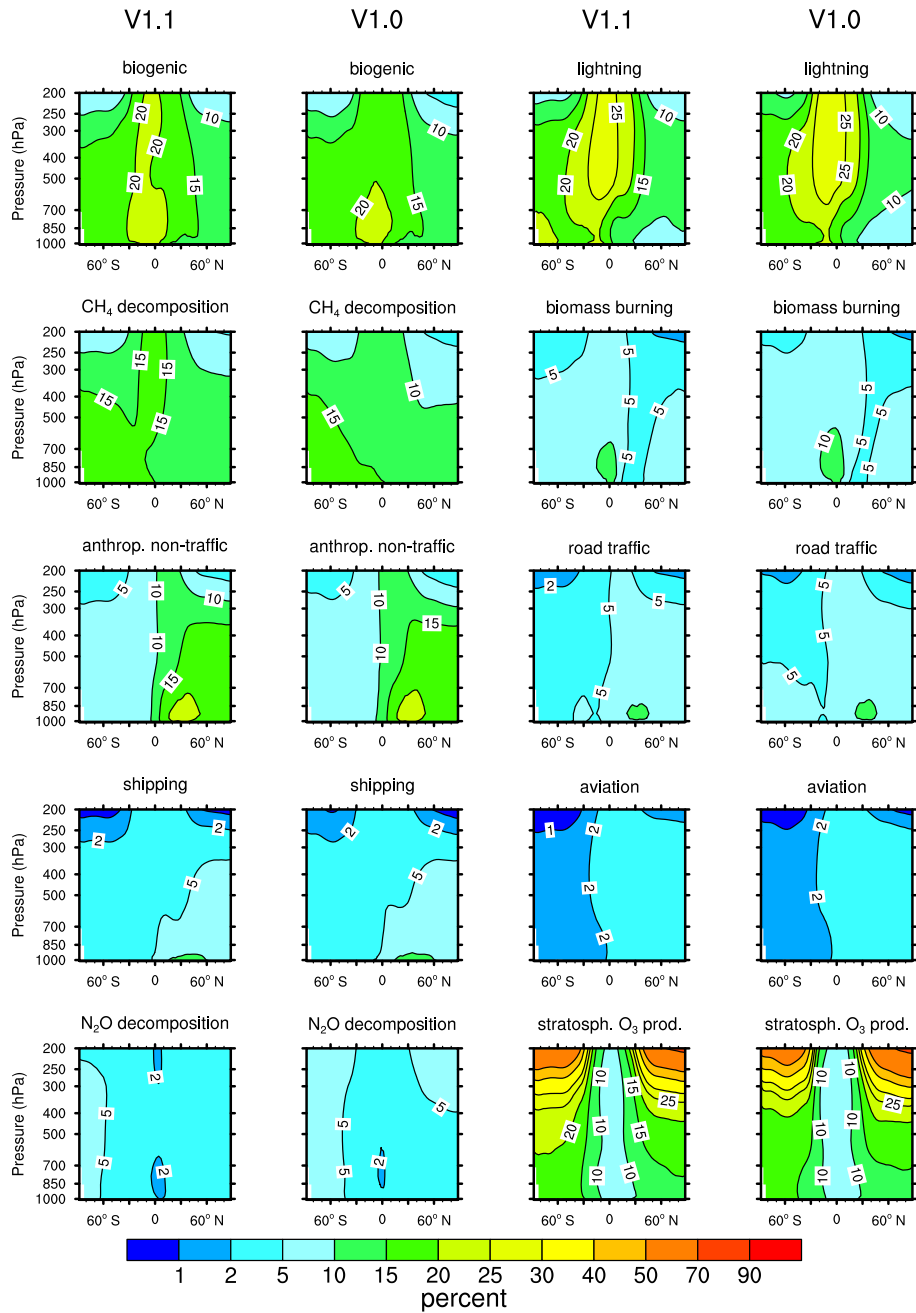

**Figure 3.** Comparison of tagging method V1.1 and V1.0 for O<sub>3</sub>. First and third columns show the tagging method V1.1. Second and fourth columns show the tagging method V1.0.

# CO

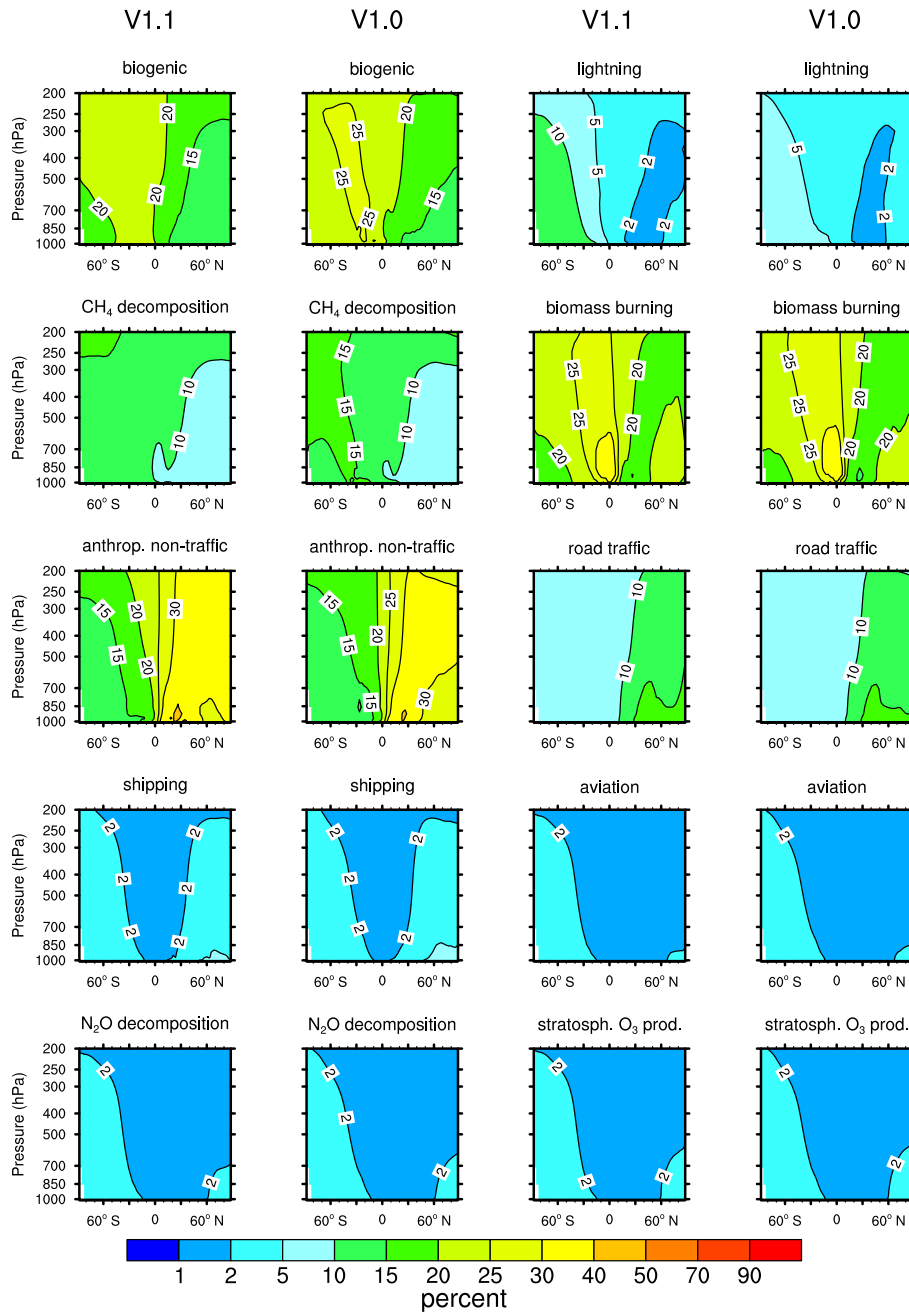

**Figure 4.** Comparison of tagging method V1.1 and V1.0 for CO. First and third columns show the tagging method V1.1. Second and fourth columns show the tagging method V1.0.

# NO<sub>y</sub>

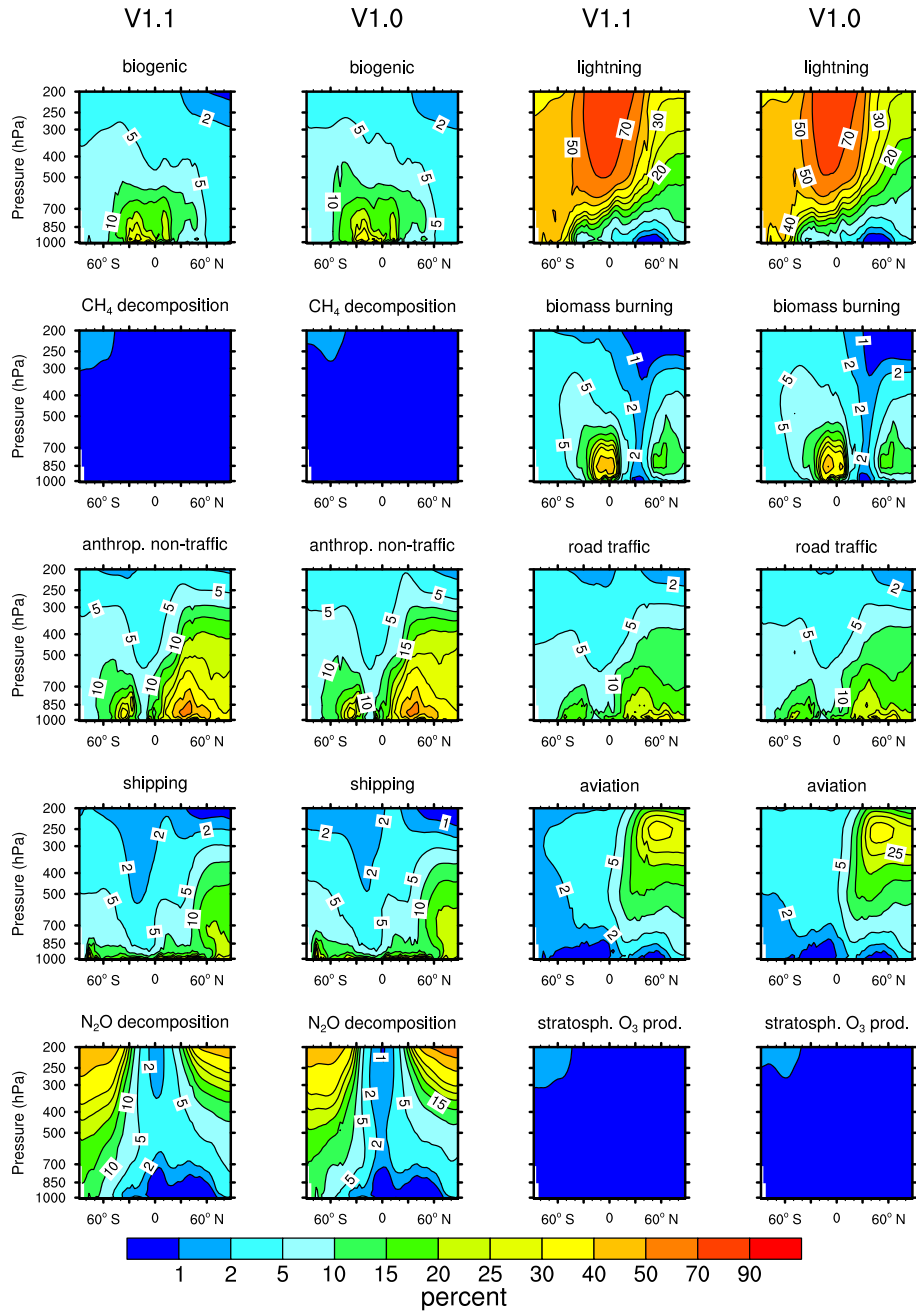

**Figure 5.** Comparison of tagging method V1.1 and V1.0 for NO<sub>y</sub>. First and third columns show the tagging method V1.1. Second and fourth columns show the tagging method V1.0.

# NMHC

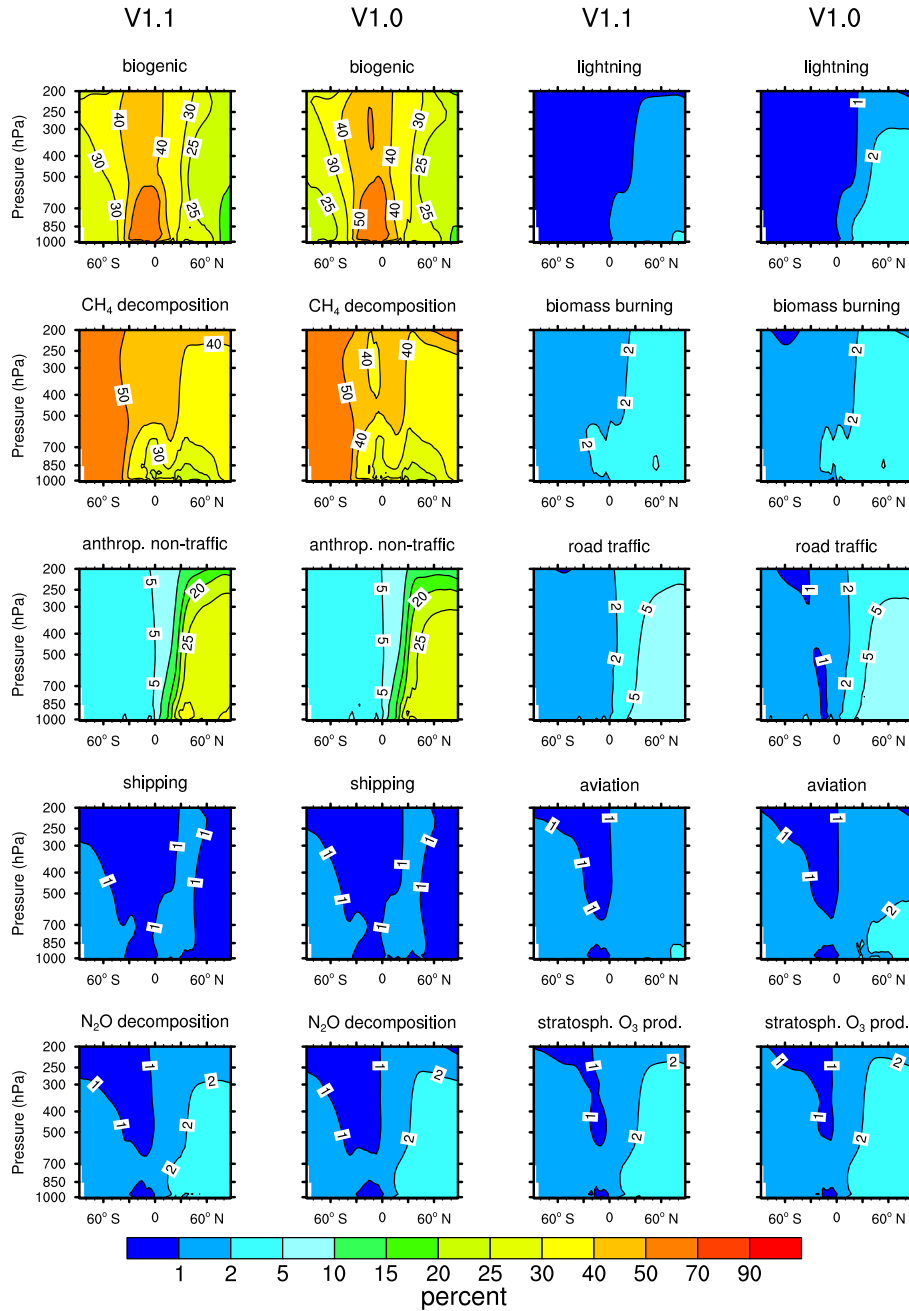

**Figure 6.** Comparison of tagging method V1.1 and V1.0 for NMHC. First and third columns show the tagging method V1.1. Second and fourth columns show the tagging method V1.0.



# PAN

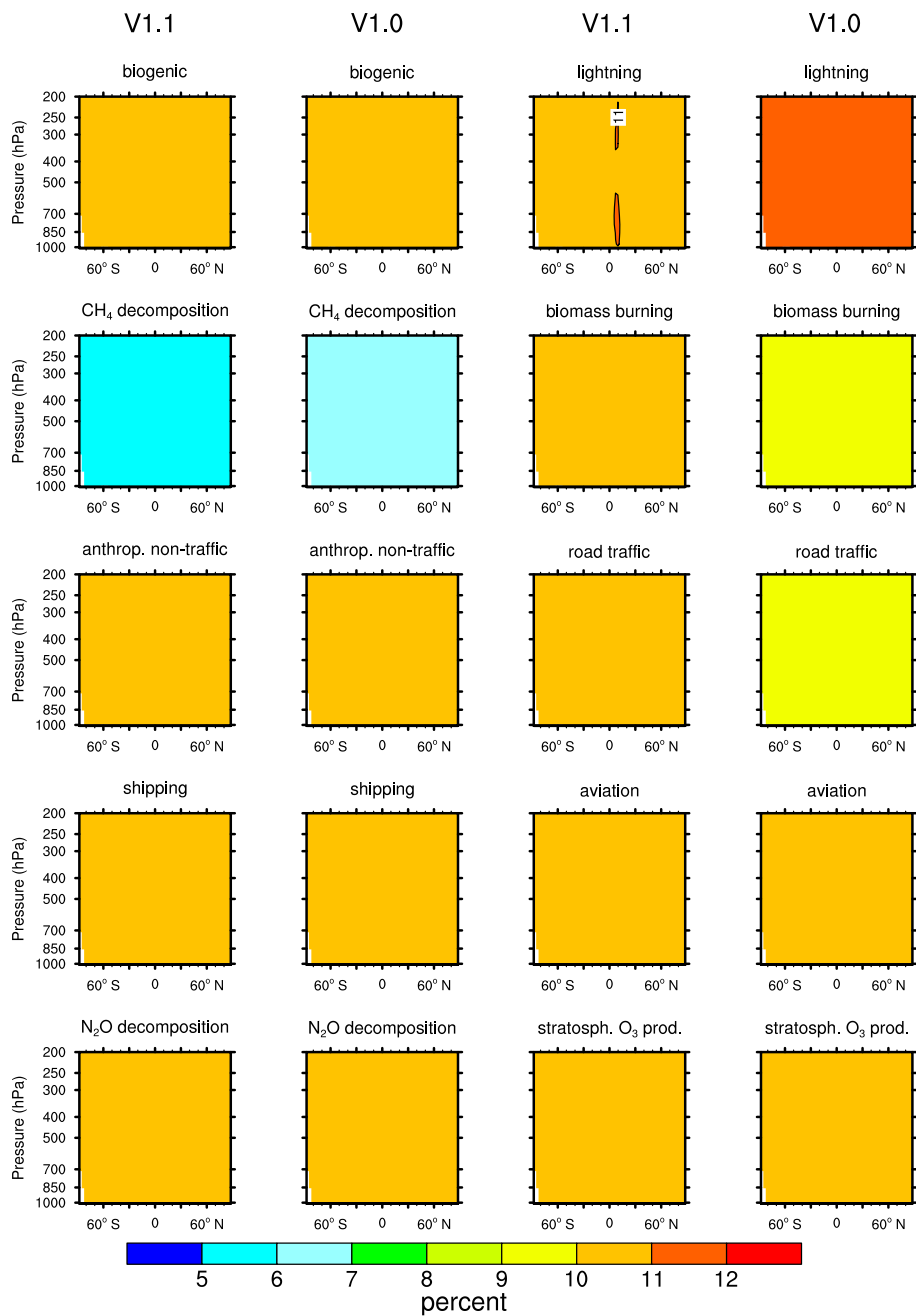

**Figure 7.** Comparison of tagging method V1.1 and V1.0 for PAN. First and third columns show the tagging method V1.1. Second and fourth columns show the tagging method V1.0.
